# Supplementary material for: Evaluating Google, Twitter, and Wikipedia as Tools for Influenza Surveillance Using Bayesian Change Point Analysis: A Comparative Analysis
Source: PubMed Central journal article supplement (PMC5095368; doi:10.2196/publichealth.5901), 2016-10-20
Supplement: publichealth_v2i2e161_app1.pdf [file publichealth_v2i2e161_app1.pdf]

## Appendix 1

Table 4. Comparison of sensitivity and positive predictive value (PPV) among web-based sources by specific influenza season.

|           | 2012-2013 influenza season |      | 2013-2014 influenza season |     | 2014-2015 influenza season |     |
|-----------|----------------------------|------|----------------------------|-----|----------------------------|-----|
|           | Sensitivity                | PPV  | Sensitivity                | PPV | Sensitivity                | PPV |
| Google    | 100%                       | 100% | 100%                       | 80% | 80%                        | 80% |
| Twitter   | 67%                        | 50%  | 75%                        | 60% | 20%                        | 20% |
| Wikipedia | 33%                        | 25%  | 50%                        | 67% | 20%                        | 33% |
